# Supplementary material for: The relative length of dual-target conjugated on iron oxide nanoparticles plays a role in brain glioma targeting
Source: Royal Society of Chemistry journal article supplement (doi:10.1039/c7ra02102j), 2017-01-01
Supplement: c7ra02102j1.pdf [file c7ra02102j1.pdf]

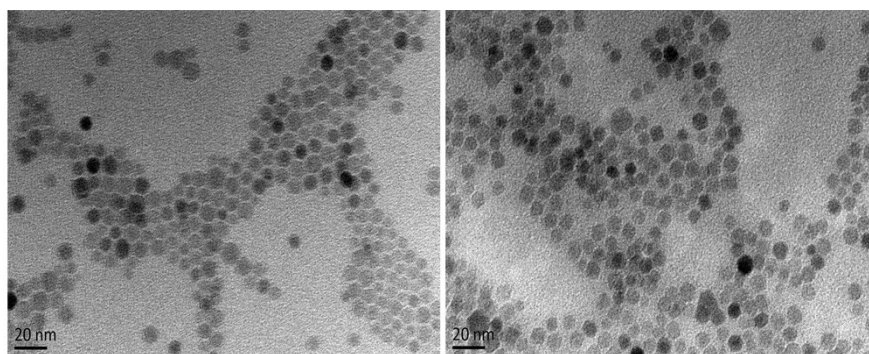

**Fig. S1** TEM images of (a) Fe<sub>3</sub>O<sub>4</sub>-OA and (b) Fe<sub>3</sub>O<sub>4</sub>-TETT NPs.

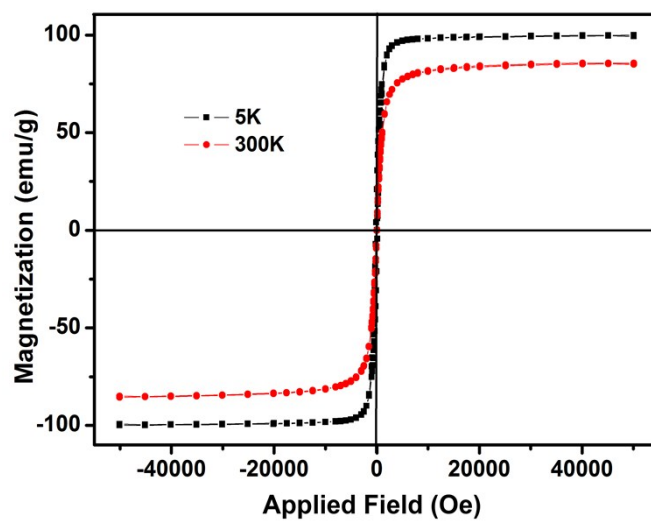

**Fig. S2** The field-dependent magnetization curve (M-H curve).

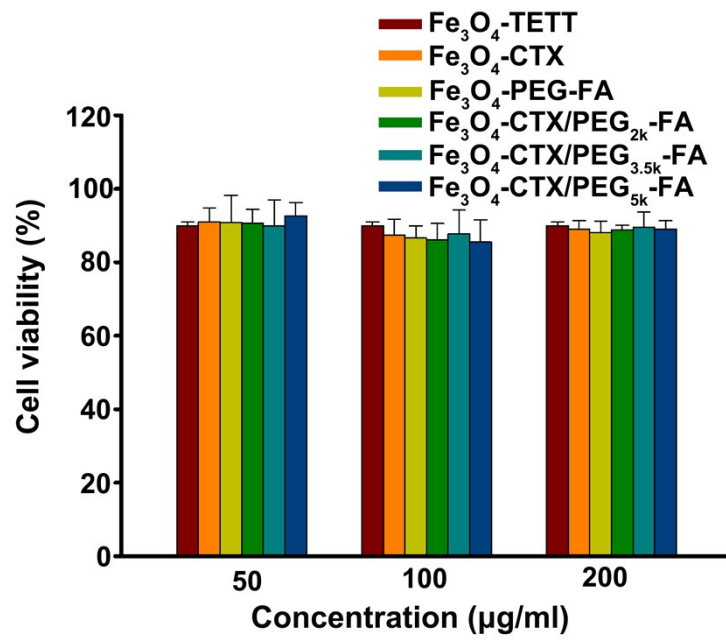

**Fig. S3** Viability of C6 cells after incubation of NPs. The data represent the mean  $\pm$  S.D. (n = 3).
